# Supplementary material for: Regional Differences in COVID-19 Vaccine Hesitancy in December 2020: A Natural Experiment in the French Working-Age Population
Source: MDPI journal article supplement (doi:10.3390/vaccines9111364), 2021-11-20
Supplement: s1 [file s1]

---

# Regional Differences in COVID-19 Vaccine Hesitancy in December 2020: A Natural Experiment in the French Working-Age Population

|                                                                                                                                  |    |
|----------------------------------------------------------------------------------------------------------------------------------|----|
| Table S1. Choice tasks and overall responses (December 2020, France).....                                                        | 2  |
| Table S2. Prevalence of detected SARS-CoV-2 infection in the French working age population .....                                 | 4  |
| Table S3. Characteristics of participants without prior SARS-CoV-2 infection by region of residency (December 2020, France)..... | 5  |
| Table S4. Outright refusal of COVID-19 vaccination (December 2020, France).....                                                  | 10 |
| Figure S1. Acceptance of Pfizer or Moderna vaccines predicted in the working age population (December 2020, France).....         | 12 |
| Figure S2. Acceptance of AstraZeneca vaccine predicted in the working age population (December 2020, France) .....               | 13 |

**Table S1.** Choice tasks and overall responses (December 2020, France).

| Block                         | Choice task | Vaccine | Vaccine efficacy | Vaccine immunity duration | Vaccine safety | Vaccine manufacturer     | Place to be vaccinated  | Vaccine uptake ( <i>n</i> = 4415) | Vaccine uptake without outright vaccination refusal ( <i>n</i> = 2592) |
|-------------------------------|-------------|---------|------------------|---------------------------|----------------|--------------------------|-------------------------|-----------------------------------|------------------------------------------------------------------------|
| Block A<br>( <i>n</i> = 2207) | 1           | A       | 90%              | No booster needed         | Unknown risk   | European Union           | Your general practice   | 556 (25.2)                        | 556 (42.8)                                                             |
|                               |             | B       | 100%             | Booster every 6 months    | 1/100,000      | China                    | Your local pharmacy     | 375 (17)                          | 375 (28.9)                                                             |
|                               | 2           | A       | 90%              | Booster every year        | 1/10,000       | European Union           | Mass vaccination centre | 694 (31.4)                        | 694 (53.5)                                                             |
|                               |             | B       | 80%              | No booster needed         | Unknown risk   | United States of America | Your general practice   | 247 (11.2)                        | 247 (19)                                                               |
|                               | 3           | A       | 100%             | Booster every year        | 1/10,000       | United States of America | Your local pharmacy     | 664 (30.1)                        | 664 (51.2)                                                             |
|                               |             | B       | 50%              | Booster every 6 months    | 1/1,000,000    | China                    | Mass vaccination centre | 172 (7.8)                         | 172 (13.3)                                                             |
|                               | 4           | A       | 50%              | Booster every year        | 1/1,000,000    | China                    | Your general practice   | 325 (14.7)                        | 325 (25)                                                               |
|                               |             | B       | 80%              | Booster every 6 months    | Unknown risk   | United States of America | Your local pharmacy     | 421 (19.1)                        | 421 (32.4)                                                             |
|                               | 5           | A       | 80%              | Booster every year        | 1/100,000      | United States of America | Mass vaccination centre | 393 (17.8)                        | 393 (30.3)                                                             |
|                               |             | B       | 90%              | No booster needed         | 1/1,000,000    | China                    | Your local pharmacy     | 521 (23.6)                        | 521 (40.1)                                                             |
|                               | 6           | A       | 80%              | Booster every year        | Unknown risk   | China                    | Your local pharmacy     | 151 (6.8)                         | 151 (11.6)                                                             |
|                               |             | B       | 100%             | No booster needed         | 1/10,000       | European Union           | Mass vaccination centre | 843 (38.2)                        | 843 (64.9)                                                             |
|                               | 7           | A       | 100%             | Booster every 6 months    | 1/100,000      | European Union           | Your general practice   | 857 (38.8)                        | 857 (66)                                                               |
|                               |             | B       | 80%              | Booster every year        | 1/10,000       | United States of America | Mass vaccination centre | 163 (7.4)                         | 163 (12.6)                                                             |
|                               | 8           | A       | 80%              | Booster every 6 months    | 1/1,000,000    | European Union           | Your local pharmacy     | 784 (35.5)                        | 784 (60.4)                                                             |

|                               |   |   |      |                        |              |                          |                         |            |            |
|-------------------------------|---|---|------|------------------------|--------------|--------------------------|-------------------------|------------|------------|
| Block B<br>( <i>n</i> = 2208) |   | B | 50%  | Booster every year     | 1/100,000    | United States of America | Your general practice   | 213 (9.7)  | 213 (16.4) |
|                               | 1 | A | 90%  | No booster needed      | 1/100,000    | United States of America | Mass vaccination centre | 622 (28.2) | 622 (48.1) |
|                               |   | B | 50%  | Booster every year     | 1/10,000     | European Union           | Your general practice   | 350 (15.9) | 350 (27)   |
|                               | 2 | A | 80%  | Booster every 6 months | 1/10,000     | China                    | Your general practice   | 202 (9.1)  | 202 (15.6) |
|                               |   | B | 100% | Booster every year     | Unknown risk | European Union           | Mass vaccination centre | 627 (28.4) | 627 (48.5) |
|                               | 3 | A | 100% | Booster every 6 months | 1/1,000,000  | United States of America | Your general practice   | 778 (35.2) | 778 (60.1) |
|                               |   | B | 50%  | No booster needed      | 1/10,000     | China                    | Your local pharmacy     | 154 (7)    | 154 (11.9) |
|                               | 4 | A | 50%  | No booster needed      | 1/100,000    | European Union           | Your local pharmacy     | 334 (15.1) | 334 (25.8) |
|                               |   | B | 90%  | Booster every year     | 1/1,000,000  | United States of America | Your local pharmacy     | 660 (29.9) | 660 (51)   |
|                               | 5 | A | 100% | No booster needed      | Unknown risk | China                    | Mass vaccination centre | 235 (10.6) | 235 (18.2) |
|                               |   | B | 90%  | Booster every 6 months | 1/100,000    | United States of America | Your general practice   | 612 (27.7) | 612 (47.3) |
|                               | 6 | A | 100% | Booster every 6 months | 1/10,000     | China                    | Your local pharmacy     | 235 (10.6) | 235 (18.2) |
|                               |   | B | 80%  | No booster needed      | 1/1,000,000  | European Union           | Mass vaccination centre | 835 (37.8) | 835 (64.5) |
|                               | 7 | A | 50%  | No booster needed      | 1/1,000,000  | United States of America | Your local pharmacy     | 530 (24)   | 530 (41)   |
|                               |   | B | 90%  | Booster every 6 months | Unknown risk | China                    | Mass vaccination centre | 272 (12.3) | 272 (21)   |
|                               | 8 | A | 50%  | Booster every 6 months | Unknown risk | United States of America | Mass vaccination centre | 207 (9.4)  | 207 (16)   |
|                               |   | B | 80%  | Booster every year     | 1/100,000    | China                    | Your general practice   | 547 (24.8) | 547 (42.3) |

Note: Refusal of both vaccines A and B is deducted from 1-uptake of vaccines A or B in each choice task.

**Table S2.** Prevalence of detected SARS-CoV-2 infection in the French working age population.

|                                                           | Survey experiment<br>(from 30 November to 16 December 2020) |                        | Epi model estimates<br>(as of 15 January 2021) |
|-----------------------------------------------------------|-------------------------------------------------------------|------------------------|------------------------------------------------|
|                                                           | <i>n</i> (%)                                                | Prevalence, % (95% CI) | Prevalence, % (95% CI)                         |
| <b>Metropolitan France</b>                                | 6007 (100)                                                  | 8.1 (7.5–8.8)          | 7.8 (6.0–10.0)                                 |
| Region of residency<br>(ordered by SARS-CoV-2 prevalence) |                                                             |                        |                                                |
| Normandie (NOR)                                           | 306 (5.1)                                                   | 4.2 (2.3–7.2)          | 4.4 (3.4–5.7)                                  |
| Bretagne (BRE)                                            | 301 (5.0)                                                   | 5.0 (2.8–8.1)          | 2.6 (2.1–3.5)                                  |
| Centre-Val de Loire (CVL)                                 | 234 (3.9)                                                   | 5.1 (2.7–8.8)          | 5.4 (4.2–7.0)                                  |
| Pays-de-la-Loire (PDL)                                    | 344 (5.7)                                                   | 5.2 (3.1–8.1)          | 4.1 (3.1–5.3)                                  |
| Nouvelle-Aquitaine (NAQ)                                  | 541 (9.0)                                                   | 6.3 (4.4–8.7)          | 3.1 (2.4–4.0)                                  |
| Bourgogne-Franche-Comté (BFC)                             | 256 (4.3)                                                   | 7.4 (4.5–11.3)         | 8.2 (6.4–10.8)                                 |
| Grand Est (GES)                                           | 527 (8.8)                                                   | 7.6 (5.5–10.2)         | 9.1 (7.1–11.9)                                 |
| Occitanie (OCC)                                           | 534 (8.9)                                                   | 8.1 (5.9–10.7)         | 4.4 (3.5–5.8)                                  |
| Provence-Alpes-Côte-d'Azur (PAC)                          | 456 (7.6)                                                   | 9.0 (6.5–12.0)         | 10.7 (8.3–14.1)                                |
| Hauts-de-France (HDF)                                     | 569 (9.5)                                                   | 9.1 (6.9–11.8)         | 7.3 (5.7–9.6)                                  |
| Auvergne-Rhône-Alpes (ARA)                                | 741 (12.3)                                                  | 9.4 (7.4–11.8)         | 7.7 (6.0–10.1)                                 |
| Ile-de-France (IDF)                                       | 1198 (19.9)                                                 | 10.9 (9.2–12.8)        | 13.2 (10.3–17.2)                               |
| Correlation coefficient ( <i>p</i> -value)                |                                                             | 0.81 (0.002)           |                                                |

Note: Epi model estimates were retrieved for the working age population (20–64 years) from Hozé et al. Monitoring the proportion of the population infected by SARS-CoV-2 using age-stratified hospitalisation and serological data: a modelling study. *The Lancet Public health* 2021, 6, e408–e415.

**Table S3.** Characteristics of participants without prior SARS-CoV-2 infection by region of residency (December 2020, France).

| Characteristics                                          | French region of residency (ordered by SARS-CoV-2 prevalence) |            |            |            |            |            |            |            |            |            |            |            | p-value |
|----------------------------------------------------------|---------------------------------------------------------------|------------|------------|------------|------------|------------|------------|------------|------------|------------|------------|------------|---------|
|                                                          | NOR                                                           | BRE        | CVL        | PDL        | NAQ        | BFC        | GES        | OCC        | PAC        | HDF        | ARA        | IDF        |         |
| N (%)                                                    | 231 (5.2)                                                     | 228 (5.2)  | 175 (4.0)  | 261 (5.9)  | 409 (9.3)  | 190 (4.3)  | 400 (9.1)  | 393 (8.9)  | 327 (7.4)  | 418 (9.5)  | 547 (12.4) | 836 (18.9) |         |
| Survey stratification variables (by region of residency) |                                                               |            |            |            |            |            |            |            |            |            |            |            |         |
| Gender                                                   |                                                               |            |            |            |            |            |            |            |            |            |            |            | 0.70    |
| Women                                                    | 129 (55.8)                                                    | 119 (52.2) | 93 (53.1)  | 140 (53.6) | 226 (55.3) | 95 (50.0)  | 220 (55.0) | 216 (55.0) | 186 (56.9) | 211 (50.5) | 278 (50.8) | 460 (55.0) |         |
| Men                                                      | 102 (44.2)                                                    | 109 (47.8) | 82 (46.9)  | 121 (46.4) | 183 (44.7) | 95 (50.0)  | 180 (45.0) | 177 (45.0) | 141 (43.1) | 207 (49.5) | 269 (49.2) | 376 (45.0) |         |
| Age group                                                |                                                               |            |            |            |            |            |            |            |            |            |            |            | 0.016   |
| 18–24 years                                              | 18 (7.8)                                                      | 23 (10.1)  | 8 (4.6)    | 32 (12.3)  | 33 (8.1)   | 21 (11.1)  | 39 (9.8)   | 35 (8.9)   | 30 (9.2)   | 60 (14.4)  | 72 (13.2)  | 67 (8.0)   |         |
| 25–34 years                                              | 40 (17.3)                                                     | 37 (16.2)  | 34 (19.4)  | 42 (16.1)  | 56 (13.7)  | 27 (14.2)  | 65 (16.3)  | 70 (17.8)  | 48 (14.7)  | 73 (17.5)  | 91 (16.6)  | 181 (21.7) |         |
| 35–44 years                                              | 49 (21.2)                                                     | 51 (22.4)  | 42 (24.0)  | 54 (20.7)  | 104 (25.4) | 44 (23.2)  | 92 (23.0)  | 90 (22.9)  | 72 (22.0)  | 88 (21.1)  | 119 (21.8) | 219 (26.2) |         |
| 45–54 years                                              | 58 (25.1)                                                     | 62 (27.2)  | 41 (23.4)  | 69 (26.4)  | 105 (25.7) | 50 (26.3)  | 109 (27.3) | 95 (24.2)  | 92 (28.1)  | 103 (24.6) | 134 (24.5) | 205 (24.5) |         |
| 55–64 years                                              | 66 (28.6)                                                     | 55 (24.1)  | 50 (28.6)  | 64 (24.5)  | 111 (27.1) | 48 (25.3)  | 95 (23.8)  | 103 (26.2) | 85 (26.0)  | 94 (22.5)  | 131 (23.9) | 164 (19.6) |         |
| Educational achievement                                  |                                                               |            |            |            |            |            |            |            |            |            |            |            | <0.001  |
| Some high school                                         | 128 (55.4)                                                    | 90 (39.5)  | 92 (52.6)  | 123 (47.1) | 201 (49.1) | 90 (47.4)  | 203 (50.8) | 177 (45.0) | 162 (49.5) | 210 (50.2) | 245 (44.8) | 298 (35.6) |         |
| High school graduate                                     | 47 (20.3)                                                     | 63 (27.6)  | 36 (20.6)  | 59 (22.6)  | 95 (23.2)  | 41 (21.6)  | 98 (24.5)  | 98 (24.9)  | 72 (22.0)  | 95 (22.7)  | 114 (20.8) | 183 (21.9) |         |
| University graduate                                      | 56 (24.2)                                                     | 75 (32.9)  | 47 (26.9)  | 79 (30.3)  | 113 (27.6) | 59 (31.1)  | 99 (24.8)  | 118 (30.0) | 93 (28.4)  | 113 (27.0) | 188 (34.4) | 355 (42.5) |         |
| Household size                                           |                                                               |            |            |            |            |            |            |            |            |            |            |            |         |
| 1 adult                                                  | 63 (27.3)                                                     | 67 (29.4)  | 44 (25.1)  | 63 (24.1)  | 111 (27.1) | 43 (22.6)  | 105 (26.3) | 106 (27.0) | 78 (23.9)  | 79 (18.9)  | 127 (23.2) | 206 (24.6) |         |
| 2 adults                                                 | 131 (56.7)                                                    | 127 (55.7) | 105 (60.0) | 157 (60.2) | 228 (55.7) | 111 (58.4) | 236 (59.0) | 231 (58.8) | 188 (57.5) | 259 (62.0) | 322 (58.9) | 475 (56.8) | 0.47    |
| ≥3 adults                                                | 37 (16.0)                                                     | 34 (14.9)  | 26 (14.9)  | 41 (15.7)  | 70 (17.1)  | 36 (18.9)  | 59 (14.8)  | 56 (14.2)  | 61 (18.7)  | 80 (19.1)  | 98 (17.9)  | 155 (18.5) |         |
| No child                                                 | 139 (60.2)                                                    | 141 (61.8) | 100 (57.1) | 161 (61.7) | 244 (59.7) | 113 (59.5) | 232 (58.0) | 233 (59.3) | 201 (61.5) | 231 (55.3) | 316 (57.8) | 498 (59.6) |         |
| 1 child                                                  | 39 (16.9)                                                     | 36 (15.8)  | 29 (16.6)  | 39 (14.9)  | 83 (20.3)  | 41 (21.6)  | 82 (20.5)  | 83 (21.1)  | 60 (18.3)  | 82 (19.6)  | 110 (20.1) | 169 (20.2) | 0.85    |
| 2 children                                               | 41 (17.7)                                                     | 33 (14.5)  | 29 (16.6)  | 43 (16.5)  | 61 (14.9)  | 26 (13.7)  | 58 (14.5)  | 52 (13.2)  | 50 (15.3)  | 72 (17.2)  | 89 (16.3)  | 123 (14.7) |         |
| ≥3 children                                              | 12 (5.2)                                                      | 18 (7.9)   | 17 (9.7)   | 18 (6.9)   | 21 (5.1)   | 10 (5.3)   | 28 (7.0)   | 25 (6.4)   | 16 (4.9)   | 33 (7.9)   | 32 (5.9)   | 46 (5.5)   |         |
| Area of residence                                        |                                                               |            |            |            |            |            |            |            |            |            |            |            | <0.001  |
| Rural area                                               | 75 (32.5)                                                     | 63 (27.6)  | 56 (32.0)  | 64 (24.5)  | 119 (29.1) | 82 (43.2)  | 103 (25.8) | 86 (21.9)  | 16 (4.9)   | 100 (23.9) | 116 (21.2) | 37 (4.4)   |         |

|                                                                |            |               |            |            |            |            |            |            |            |            |            |            |
|----------------------------------------------------------------|------------|---------------|------------|------------|------------|------------|------------|------------|------------|------------|------------|------------|
| Urban area <100,000 inhabitants                                | 87 (37.7)  | 113<br>(49.6) | 70 (40.0)  | 106 (40.6) | 137 (33.5) | 68 (35.8)  | 153 (38.3) | 161 (41.0) | 66 (20.2)  | 134 (32.1) | 178 (32.5) | 56 (6.7)   |
| Urban area ≥100,000 inhabitants                                | 69 (29.9)  | 52 (22.8)     | 49 (28.0)  | 91 (34.9)  | 153 (37.4) | 40 (21.1)  | 144 (36.0) | 146 (37.2) | 245 (74.9) | 184 (44.0) | 253 (46.3) | 743 (88.9) |
| Variables related to vaccination behavior                      |            |               |            |            |            |            |            |            |            |            |            |            |
| Working status                                                 |            |               |            |            |            |            |            |            |            |            |            | <0.001     |
| Healthcare worker                                              | 16 (6.9)   | 22 (9.6)      | 16 (9.1)   | 22 (8.4)   | 43 (10.5)  | 20 (10.5)  | 38 (9.5)   | 38 (9.7)   | 33 (10.1)  | 31 (7.4)   | 42 (7.7)   | 62 (7.4)   |
| Worker in contact with the public                              | 75 (32.5)  | 61 (26.8)     | 44 (25.1)  | 65 (24.9)  | 143 (35.0) | 58 (30.5)  | 108 (27.0) | 108 (27.5) | 114 (34.9) | 98 (23.4)  | 157 (28.7) | 281 (33.6) |
| Worker not in contact with the public                          | 61 (26.4)  | 64 (28.1)     | 55 (31.4)  | 96 (36.8)  | 94 (23.0)  | 44 (23.2)  | 112 (28.0) | 99 (25.2)  | 81 (24.8)  | 110 (26.3) | 164 (30.0) | 284 (34.0) |
| Not working                                                    | 79 (34.2)  | 81 (35.5)     | 60 (34.3)  | 78 (29.9)  | 129 (31.5) | 68 (35.8)  | 142 (35.5) | 148 (37.7) | 99 (30.3)  | 179 (42.8) | 184 (33.6) | 209 (25.0) |
| Unemployed or furloughed because of the COVID-19 health crisis |            |               |            |            |            |            |            |            |            |            |            | 0.022      |
| Yes                                                            | 34 (14.7)  | 34 (14.9)     | 27 (15.4)  | 57 (21.8)  | 65 (15.9)  | 32 (16.8)  | 75 (18.8)  | 73 (18.6)  | 62 (19.0)  | 61 (14.6)  | 92 (16.8)  | 186 (22.2) |
| Not reported                                                   | 197 (85.3) | 194<br>(85.1) | 148 (84.6) | 204 (78.2) | 344 (84.1) | 158 (83.2) | 325 (81.3) | 320 (81.4) | 265 (81.0) | 357 (85.4) | 455 (83.2) | 650 (77.8) |
| Compliance with recommended vaccinations in the past           |            |               |            |            |            |            |            |            |            |            |            | 0.003      |
| Always                                                         | 114 (49.4) | 113<br>(49.6) | 78 (44.6)  | 120 (46.0) | 185 (45.2) | 90 (47.4)  | 166 (41.5) | 152 (38.7) | 110 (33.6) | 178 (42.6) | 233 (42.6) | 375 (44.9) |
| Sometimes                                                      | 83 (35.9)  | 87 (38.2)     | 70 (40.0)  | 108 (41.4) | 170 (41.6) | 75 (39.5)  | 184 (46.0) | 174 (44.3) | 144 (44.0) | 189 (45.2) | 238 (43.5) | 353 (42.2) |
| Never                                                          | 34 (14.7)  | 28 (12.3)     | 27 (15.4)  | 33 (12.6)  | 54 (13.2)  | 25 (13.2)  | 50 (12.5)  | 67 (17.0)  | 73 (22.3)  | 51 (12.2)  | 76 (13.9)  | 108 (12.9) |
| Vaccination against influenza 2020/2021                        |            |               |            |            |            |            |            |            |            |            |            | 0.084      |
| Yes                                                            | 40 (17.3)  | 37 (16.2)     | 33 (18.9)  | 29 (11.1)  | 63 (15.4)  | 34 (17.9)  | 70 (17.5)  | 48 (12.2)  | 42 (12.8)  | 56 (13.4)  | 65 (11.9)  | 121 (14.5) |
| Not reported                                                   | 191 (82.7) | 191<br>(83.8) | 142 (81.1) | 232 (88.9) | 346 (84.6) | 156 (82.1) | 330 (82.5) | 345 (87.8) | 285 (87.2) | 362 (86.6) | 482 (88.1) | 715 (85.5) |
| At-risk group of severe COVID-19                               |            |               |            |            |            |            |            |            |            |            |            |            |
| Pregnancy (among women)                                        |            |               |            |            |            |            |            |            |            |            |            | 0.17       |
| Yes                                                            | 0 (0.0)    | 1 (0.8)       | 3 (3.2)    | 1 (0.7)    | 4 (1.8)    | 0 (0.0)    | 1 (0.5)    | 4 (1.9)    | 2 (1.1)    | 3 (1.4)    | 10 (3.6)   | 10 (2.2)   |
| Not reported                                                   | 129 (100)  | 118<br>(99.2) | 90 (96.8)  | 139 (99.3) | 222 (98.2) | 95 (100)   | 219 (99.6) | 212 (98.2) | 184 (98.9) | 208 (98.6) | 268 (96.4) | 450 (97.3) |
| Smoking status                                                 |            |               |            |            |            |            |            |            |            |            |            | 0.37       |
| Current smoker                                                 | 73 (31.6)  | 58 (25.4)     | 46 (26.3)  | 58 (22.2)  | 108 (26.4) | 48 (25.3)  | 115 (28.8) | 108 (27.5) | 88 (26.9)  | 114 (27.3) | 152 (27.8) | 211 (25.2) |
| Former smoker                                                  | 80 (34.6)  | 90 (39.5)     | 58 (33.1)  | 99 (37.9)  | 151 (36.9) | 58 (30.5)  | 130 (32.5) | 135 (34.4) | 117 (35.8) | 136 (32.5) | 175 (32.0) | 261 (31.2) |
| Never smoker                                                   | 78 (33.8)  | 80 (35.1)     | 71 (40.6)  | 104 (39.8) | 150 (36.7) | 84 (44.2)  | 155 (38.8) | 150 (38.2) | 122 (37.3) | 168 (40.2) | 220 (40.2) | 364 (43.5) |
| Body mass index                                                |            |               |            |            |            |            |            |            |            |            |            | 0.016      |

|                                                                      |            |            |            |            |            |            |            |            |            |            |            |            |        |
|----------------------------------------------------------------------|------------|------------|------------|------------|------------|------------|------------|------------|------------|------------|------------|------------|--------|
| Obesity ( $\geq 30$ kg/m <sup>2</sup> )                              | 54 (23.4)  | 43 (18.9)  | 34 (19.4)  | 37 (14.2)  | 73 (17.8)  | 28 (14.7)  | 106 (26.5) | 74 (18.8)  | 53 (16.2)  | 88 (21.1)  | 97 (17.7)  | 149 (17.8) |        |
| Overweight (25–30 kg/m <sup>2</sup> )                                | 73 (31.6)  | 82 (36.0)  | 66 (37.7)  | 82 (31.4)  | 138 (33.7) | 63 (33.2)  | 121 (30.3) | 127 (32.3) | 102 (31.2) | 142 (34.0) | 164 (30.0) | 276 (33.0) |        |
| Normal weight ( $\leq 25$ kg/m <sup>2</sup> )                        | 104 (45.0) | 103 (45.2) | 75 (42.9)  | 142 (54.4) | 198 (48.4) | 99 (52.1)  | 173 (43.3) | 192 (48.9) | 172 (52.6) | 188 (45.0) | 286 (52.3) | 411 (49.2) |        |
| Hypertension                                                         |            |            |            |            |            |            |            |            |            |            |            |            | <0.001 |
| Yes                                                                  | 18 (7.8)   | 23 (10.1)  | 14 (8.0)   | 27 (10.3)  | 34 (8.3)   | 15 (7.9)   | 67 (16.8)  | 27 (6.9)   | 20 (6.1)   | 51 (12.2)  | 42 (7.7)   | 73 (8.7)   |        |
| Not reported                                                         | 213 (92.2) | 205 (89.9) | 161 (92.0) | 234 (89.7) | 375 (91.7) | 175 (92.1) | 333 (83.3) | 366 (93.1) | 307 (93.9) | 367 (87.8) | 505 (92.3) | 763 (91.3) |        |
| Diabetes mellitus                                                    |            |            |            |            |            |            |            |            |            |            |            |            | 0.24   |
| Yes                                                                  | 14 (6.1)   | 9 (3.9)    | 8 (4.6)    | 7 (2.7)    | 19 (4.6)   | 9 (4.7)    | 24 (6.0)   | 15 (3.8)   | 14 (4.3)   | 27 (6.5)   | 18 (3.3)   | 29 (3.5)   |        |
| Not reported                                                         | 217 (93.9) | 219 (96.1) | 167 (95.4) | 254 (97.3) | 390 (95.4) | 181 (95.3) | 376 (94.0) | 378 (96.2) | 313 (95.7) | 391 (93.5) | 529 (96.7) | 807 (96.5) |        |
| Other chronic condition*                                             |            |            |            |            |            |            |            |            |            |            |            |            | 0.068  |
| Yes                                                                  | 28 (12.1)  | 23 (10.1)  | 18 (10.3)  | 22 (8.4)   | 35 (8.6)   | 16 (8.4)   | 50 (12.5)  | 30 (7.6)   | 24 (7.3)   | 48 (11.5)  | 43 (7.9)   | 61 (7.3)   |        |
| Not reported                                                         | 203 (87.9) | 205 (89.9) | 157 (89.7) | 239 (91.6) | 374 (91.4) | 174 (91.6) | 350 (87.5) | 363 (92.4) | 303 (92.7) | 370 (88.5) | 504 (92.1) | 775 (92.7) |        |
| Experience of COVID-19                                               |            |            |            |            |            |            |            |            |            |            |            |            |        |
| Had COVID-19 symptoms (without medical confirmation)                 |            |            |            |            |            |            |            |            |            |            |            |            | <0.001 |
| Yes                                                                  | 25 (10.8)  | 31 (13.6)  | 26 (14.9)  | 36 (13.8)  | 54 (13.2)  | 21 (11.1)  | 90 (22.5)  | 79 (20.1)  | 76 (23.2)  | 74 (17.7)  | 114 (20.8) | 202 (24.2) |        |
| Not reported                                                         | 206 (89.2) | 197 (86.4) | 149 (85.1) | 225 (86.2) | 355 (86.8) | 169 (88.9) | 310 (77.5) | 314 (79.9) | 251 (76.8) | 344 (82.3) | 433 (79.2) | 634 (75.8) |        |
| Had a test for SARS-CoV-2 infection diagnosis (with negative result) |            |            |            |            |            |            |            |            |            |            |            |            | 0.19   |
| Yes                                                                  | 36 (15.6)  | 34 (14.9)  | 35 (20.0)  | 39 (14.9)  | 69 (16.9)  | 34 (17.9)  | 65 (16.3)  | 74 (18.8)  | 77 (23.5)  | 79 (18.9)  | 94 (17.2)  | 166 (19.9) |        |
| Not reported                                                         | 195 (84.4) | 194 (85.1) | 140 (80.0) | 222 (85.1) | 340 (83.1) | 156 (82.1) | 335 (83.8) | 319 (81.2) | 250 (76.5) | 339 (81.1) | 453 (82.8) | 670 (80.1) |        |
| Knows someone who got COVID-19                                       |            |            |            |            |            |            |            |            |            |            |            |            | <0.001 |
| Yes with hospital admission                                          | 32 (13.9)  | 26 (11.4)  | 30 (17.1)  | 35 (13.4)  | 42 (10.3)  | 38 (20.0)  | 72 (18.0)  | 67 (17.0)  | 66 (20.2)  | 60 (14.4)  | 126 (23.0) | 186 (22.2) |        |
| Yes without hospital admission                                       | 80 (34.6)  | 88 (38.6)  | 65 (37.1)  | 121 (46.4) | 162 (39.6) | 92 (48.4)  | 168 (42.0) | 161 (41.0) | 152 (46.5) | 184 (44.0) | 261 (47.7) | 397 (47.5) |        |
| Not reported                                                         | 119 (51.5) | 114 (50.0) | 80 (45.7)  | 105 (40.2) | 205 (50.1) | 60 (31.6)  | 160 (40.0) | 165 (42.0) | 109 (33.3) | 174 (41.6) | 160 (29.3) | 253 (30.3) |        |
| Curfew in the municipality                                           |            |            |            |            |            |            |            |            |            |            |            |            | <0.001 |

|                                                                                            |            |            |           |            |            |           |            |            |            |            |            |             |
|--------------------------------------------------------------------------------------------|------------|------------|-----------|------------|------------|-----------|------------|------------|------------|------------|------------|-------------|
| Starting on 17 October 2020                                                                | 89 (38.5)  | 0 (0.0)    | 0 (0.0)   | 0 (0.0)    | 0 (0.0)    | 0 (0.0)   | 0 (0.0)    | 185 (47.1) | 117 (35.8) | 180 (43.1) | 300 (54.8) | 836 (100.0) |
| Starting on 28 October 2020                                                                | 51 (22.1)  | 75 (32.9)  | 92 (52.6) | 64 (24.5)  | 66 (16.1)  | 92 (48.4) | 242 (60.5) | 159 (40.5) | 199 (60.9) | 158 (37.8) | 211 (38.6) | 0 (0.0)     |
| Starting on 15 December 2020                                                               | 91 (39.4)  | 153 (67.1) | 83 (47.4) | 197 (75.5) | 343 (83.9) | 98 (51.6) | 158 (39.5) | 49 (12.5)  | 11 (3.4)   | 80 (19.1)  | 36 (6.6)   | 0 (0.0)     |
| Perceived severity of COVID-19 if infected                                                 |            |            |           |            |            |           |            |            |            |            |            | 0.002       |
| Very severe                                                                                | 20 (8.7)   | 24 (10.5)  | 15 (8.6)  | 13 (5.0)   | 17 (4.2)   | 17 (8.9)  | 34 (8.5)   | 23 (5.9)   | 18 (5.5)   | 32 (7.7)   | 29 (5.3)   | 65 (7.8)    |
| Somewhat severe                                                                            | 79 (34.2)  | 64 (28.1)  | 55 (31.4) | 84 (32.2)  | 152 (37.2) | 60 (31.6) | 138 (34.5) | 124 (31.6) | 99 (30.3)  | 168 (40.2) | 165 (30.2) | 303 (36.2)  |
| Not particularly severe                                                                    | 75 (32.5)  | 84 (36.8)  | 53 (30.3) | 90 (34.5)  | 148 (36.2) | 62 (32.6) | 128 (32.0) | 129 (32.8) | 121 (37.0) | 117 (28.0) | 213 (38.9) | 276 (33.0)  |
| Not severe at all                                                                          | 15 (6.5)   | 25 (11.0)  | 9 (5.1)   | 28 (10.7)  | 26 (6.4)   | 23 (12.1) | 38 (9.5)   | 40 (10.2)  | 34 (10.4)  | 32 (7.7)   | 55 (10.1)  | 67 (8.0)    |
| Don't know                                                                                 | 42 (18.2)  | 31 (13.6)  | 43 (24.6) | 46 (17.6)  | 66 (16.1)  | 28 (14.7) | 62 (15.5)  | 77 (19.6)  | 55 (16.8)  | 69 (16.5)  | 85 (15.5)  | 125 (15.0)  |
| Background information on COVID-19 vaccination                                             |            |            |           |            |            |           |            |            |            |            |            |             |
| Herd immunity against SARS-CoV-2                                                           |            |            |           |            |            |           |            |            |            |            |            | 0.099       |
| >66% of adults aged 18–64 years old must be immunized (either by vaccination or infection) | 83 (35.9)  | 75 (32.9)  | 64 (36.6) | 86 (33.0)  | 138 (33.7) | 70 (36.8) | 130 (32.5) | 136 (34.6) | 118 (36.1) | 124 (29.7) | 184 (33.6) | 264 (31.6)  |
| >50% of adults aged 18–64 years old must be immunized (either by vaccination or infection) | 85 (36.8)  | 69 (30.3)  | 52 (29.7) | 84 (32.2)  | 145 (35.5) | 40 (21.1) | 143 (35.8) | 124 (31.6) | 108 (33.0) | 159 (38.0) | 180 (32.9) | 282 (33.7)  |
| No information                                                                             | 63 (27.3)  | 84 (36.8)  | 59 (33.7) | 91 (34.9)  | 126 (30.8) | 80 (42.1) | 127 (31.8) | 133 (33.8) | 101 (30.9) | 135 (32.3) | 183 (33.5) | 290 (34.7)  |
| General practitioner's advice on vaccination                                               |            |            |           |            |            |           |            |            |            |            |            | 0.47        |
| Recommendation                                                                             | 111 (48.1) | 108 (47.4) | 99 (56.6) | 133 (51.0) | 194 (47.4) | 92 (48.4) | 212 (53.0) | 184 (46.8) | 157 (48.0) | 221 (52.9) | 277 (50.6) | 427 (51.1)  |
| No opinion                                                                                 | 120 (51.9) | 120 (52.6) | 76 (43.4) | 128 (49.0) | 215 (52.6) | 98 (51.6) | 188 (47.0) | 209 (53.2) | 170 (52.0) | 197 (47.1) | 270 (49.4) | 409 (48.9)  |

\* Normandie (NOR); Bretagne (BRE); Centre-Val de Loire (CVL); Pays-de-la-Loire (PDL); Nouvelle-Aquitaine (NAQ); Bourgogne-Franche-Comté (BFC); Grand Est (GES); Occitanie (OCC); Provence-Alpes-Côte d'Azur (PAC); Hauts-de-France (HDF); Auvergne-Rhône-Alpes (ARA); Ile-de-France (IDF).  
\*\* Chronic conditions include: 137 (34%) asthma; 130 (33%) chronic lung disease other than asthma; 35 (9%) chronic arterial disease; 95 (24%) chronic heart disease; 18 (5%) chronic kidney disease; 39 (10%) cancer.



**Table S4.** Outright refusal of COVID-19 vaccination (December 2020, France).

| Characteristics                                               | All participants<br>without SARS-<br>CoV-2 infection | Outright refusal of<br>COVID-19 vaccination |             | <i>p</i> -<br>value |
|---------------------------------------------------------------|------------------------------------------------------|---------------------------------------------|-------------|---------------------|
|                                                               |                                                      | Yes                                         | No          |                     |
| <i>N</i> (%)                                                  | 4415 (100.0)                                         | 1823 (41.3)                                 | 2592 (58.7) |                     |
| French region of residency (ordered by SARS-CoV-2 prevalence) |                                                      |                                             |             | 0.18                |
| Normandie (NOR)                                               | 231 (5.2)                                            | 95 (41.1)                                   | 136 (58.9)  |                     |
| Bretagne (BRE)                                                | 228 (5.2)                                            | 85 (37.3)                                   | 143 (62.7)  |                     |
| Centre-Val de Loire (CVL)                                     | 175 (4.0)                                            | 70 (40.0)                                   | 105 (60.0)  |                     |
| Pays-de-la-Loire (PDL)                                        | 261 (5.9)                                            | 97 (37.2)                                   | 164 (62.8)  |                     |
| Nouvelle-Aquitaine (NAQ)                                      | 409 (9.3)                                            | 183 (44.7)                                  | 226 (55.3)  |                     |
| Bourgogne-Franche-Comté (BFC)                                 | 190 (4.3)                                            | 76 (40.0)                                   | 114 (60.0)  |                     |
| Grand Est (GES)                                               | 400 (9.1)                                            | 159 (39.8)                                  | 241 (60.3)  |                     |
| Occitanie (OCC)                                               | 393 (8.9)                                            | 185 (47.1)                                  | 208 (52.9)  |                     |
| Provence-Alpes-Côte-d'Azur (PAC)                              | 327 (7.4)                                            | 144 (44.0)                                  | 183 (56.0)  |                     |
| Hauts-de-France (HDF)                                         | 418 (9.5)                                            | 170 (40.7)                                  | 248 (59.3)  |                     |
| Auvergne-Rhône-Alpes (ARA)                                    | 547 (12.4)                                           | 234 (42.8)                                  | 313 (57.2)  |                     |
| Ile-de-France (IDF)                                           | 836 (18.9)                                           | 325 (38.9)                                  | 511 (61.1)  |                     |
| Survey stratification variables (by region of residency)      |                                                      |                                             |             |                     |
| Gender                                                        |                                                      |                                             |             | <0.001              |
| Women                                                         | 2373 (53.7)                                          | 1139 (48.0)                                 | 1234 (52.0) |                     |
| Men                                                           | 2042 (46.3)                                          | 684 (33.5)                                  | 1358 (66.5) |                     |
| Age group                                                     |                                                      |                                             |             | <0.001              |
| 18–24 years                                                   | 438 (9.9)                                            | 153 (34.9)                                  | 285 (65.1)  |                     |
| 25–34 years                                                   | 764 (17.3)                                           | 359 (47.0)                                  | 405 (53.0)  |                     |
| 35–44 years                                                   | 1024 (23.2)                                          | 446 (43.6)                                  | 578 (56.4)  |                     |
| 45–54 years                                                   | 1123 (25.4)                                          | 465 (41.4)                                  | 658 (58.6)  |                     |
| 55–64 years                                                   | 1066 (24.1)                                          | 400 (37.5)                                  | 666 (62.5)  |                     |
| Educational achievement                                       |                                                      |                                             |             | <0.001              |
| Some high school                                              | 2019 (45.7)                                          | 929 (46.0)                                  | 1090 (54.0) |                     |
| High school graduate                                          | 1001 (22.7)                                          | 423 (42.3)                                  | 578 (57.7)  |                     |
| University graduate                                           | 1395 (31.6)                                          | 471 (33.8)                                  | 924 (66.2)  |                     |
| Household size                                                |                                                      |                                             |             |                     |
| 1 adult                                                       | 1092 (24.7)                                          | 458 (41.9)                                  | 634 (58.1)  |                     |
| 2 adults                                                      | 2570 (58.2)                                          | 1075 (41.8)                                 | 1495 (58.2) | 0.24                |
| ≥3 adults                                                     | 753 (17.1)                                           | 290 (38.5)                                  | 463 (61.5)  |                     |
| No child                                                      | 2609 (59.1)                                          | 1028 (39.4)                                 | 1581 (60.6) |                     |
| 1 child                                                       | 853 (19.3)                                           | 375 (44.0)                                  | 478 (56.0)  |                     |
| 2 children                                                    | 677 (15.3)                                           | 286 (42.2)                                  | 391 (57.8)  | 0.006               |
| ≥3 children                                                   | 276 (6.3)                                            | 134 (48.6)                                  | 142 (51.4)  |                     |
| Area of residence                                             |                                                      |                                             |             | <0.001              |
| Rural area                                                    | 917 (20.8)                                           | 413 (45.0)                                  | 504 (55.0)  |                     |
| Urban area <100,000 inhabitants                               | 1329 (30.1)                                          | 578 (43.5)                                  | 751 (56.5)  |                     |
| Urban area ≥100,000 inhabitants                               | 2169 (49.1)                                          | 832 (38.4)                                  | 1337 (61.6) |                     |
| Variables related to vaccination behavior                     |                                                      |                                             |             |                     |

|                                                                      |             |             |             |        |
|----------------------------------------------------------------------|-------------|-------------|-------------|--------|
| Working status                                                       |             |             |             | 0.95   |
| Healthcare worker                                                    | 383 (8.7)   | 160 (41.8)  | 223 (58.2)  |        |
| Worker in contact with the public                                    | 1312 (29.7) | 533 (40.6)  | 779 (59.4)  |        |
| Worker not in contact with the public                                | 1264 (28.6) | 523 (41.4)  | 741 (58.6)  |        |
| Not working                                                          | 1456 (33.0) | 607 (41.7)  | 849 (58.3)  |        |
| Unemployed or furloughed because of the COVID-19 health crisis       |             |             |             | 0.66   |
| Yes                                                                  | 798 (18.1)  | 324 (40.6)  | 474 (59.4)  |        |
| Not reported                                                         | 3617 (81.9) | 1499 (41.4) | 2118 (58.6) |        |
| Compliance with recommended vaccinations in the past                 |             |             |             | <0.001 |
| Always                                                               | 1914 (43.4) | 515 (26.9)  | 1399 (73.1) |        |
| Sometimes                                                            | 1875 (42.5) | 870 (46.4)  | 1005 (53.6) |        |
| Never                                                                | 626 (14.2)  | 438 (70.0)  | 188 (30.0)  |        |
| Vaccination against influenza 2020/2021                              |             |             |             | <0.001 |
| Yes                                                                  | 638 (14.5)  | 128 (20.1)  | 510 (79.9)  |        |
| Not reported                                                         | 3777 (85.5) | 1695 (44.9) | 2082 (55.1) |        |
| At-risk group of severe COVID-19                                     |             |             |             |        |
| Pregnancy (among women)                                              |             |             |             | 0.024  |
| Yes                                                                  | 39 (1.6)    | 23 (59.0)   | 16 (41.0)   |        |
| Not reported                                                         | 2334 (98.4) | 1116 (47.8) | 1218 (52.2) |        |
| Smoking status                                                       |             |             |             | 0.38   |
| Current smoker                                                       | 1179 (26.7) | 507 (43.0)  | 672 (57.0)  |        |
| Former smoker                                                        | 1490 (33.7) | 607 (40.7)  | 883 (59.3)  |        |
| Never smoker                                                         | 1746 (39.5) | 709 (40.6)  | 1037 (59.4) |        |
| Body mass index                                                      |             |             |             | 0.54   |
| Obesity ( $\geq 30$ kg/m <sup>2</sup> )                              | 836 (18.9)  | 332 (39.7)  | 504 (60.3)  |        |
| Overweight (25-30 kg/m <sup>2</sup> )                                | 1436 (32.5) | 604 (42.1)  | 832 (57.9)  |        |
| Normal weight ( $\leq 25$ kg/m <sup>2</sup> )                        | 2143 (48.5) | 887 (41.4)  | 1256 (58.6) |        |
| Hypertension                                                         |             |             |             | <0.001 |
| Yes                                                                  | 411 (9.3)   | 123 (29.9)  | 288 (70.1)  |        |
| Not reported                                                         | 4004 (90.7) | 1700 (42.5) | 2304 (57.5) |        |
| Diabetes mellitus                                                    |             |             |             | <0.001 |
| Yes                                                                  | 193 (4.4)   | 54 (28.0)   | 139 (72.0)  |        |
| Not reported                                                         | 4222 (95.6) | 1769 (41.9) | 2453 (58.1) |        |
| Other chronic condition*                                             |             |             |             | <0.001 |
| Yes                                                                  | 398 (9.0)   | 126 (31.7)  | 272 (68.3)  |        |
| Not reported                                                         | 4017 (91.0) | 1697 (42.2) | 2320 (57.8) |        |
| Experience of COVID-19                                               |             |             |             |        |
| Had COVID-19 symptoms (without medical confirmation)                 |             |             |             | 0.14   |
| Yes                                                                  | 828 (18.8)  | 323 (39.0)  | 505 (61.0)  |        |
| Not reported                                                         | 3587 (81.2) | 1500 (41.8) | 2087 (58.2) |        |
| Had a test for SARS-CoV-2 infection diagnosis (with negative result) |             |             |             | 0.038  |
| Yes                                                                  | 802 (18.2)  | 305 (38.0)  | 497 (62.0)  |        |
| Not reported                                                         | 3613 (81.8) | 1518 (42.0) | 2095 (58.0) |        |
| Knows someone who got COVID-19                                       |             |             |             | <0.001 |

---

|                                                                                            |             |            |             |        |
|--------------------------------------------------------------------------------------------|-------------|------------|-------------|--------|
| Yes with hospital admission                                                                | 780 (17.7)  | 291 (37.3) | 489 (62.7)  |        |
| Yes without hospital admission                                                             | 1931 (43.7) | 759 (39.3) | 1172 (60.7) |        |
| Not reported                                                                               | 1704 (38.6) | 773 (45.4) | 931 (54.6)  |        |
| Curfew in the municipality                                                                 |             |            |             | 0.46   |
| Starting on 17 October 2020                                                                | 1707 (38.7) | 685 (40.1) | 1022 (59.9) |        |
| Starting on 28 October 2020                                                                | 1409 (31.9) | 591 (41.9) | 818 (58.1)  |        |
| Starting on 15 December 2020                                                               | 1299 (29.4) | 547 (42.1) | 752 (57.9)  |        |
| Perceived severity of COVID-19 if infected                                                 |             |            |             | <0.001 |
| Very severe                                                                                | 307 (7.0)   | 89 (29.0)  | 218 (71.0)  |        |
| Somewhat severe                                                                            | 1491 (33.8) | 530 (35.5) | 961 (64.5)  |        |
| Not particularly severe                                                                    | 1496 (33.9) | 648 (43.3) | 848 (56.7)  |        |
| Not severe at all                                                                          | 392 (8.9)   | 205 (52.3) | 187 (47.7)  |        |
| Don't know                                                                                 | 729 (16.5)  | 351 (48.1) | 378 (51.9)  |        |
| Background information on COVID-19 vaccination                                             |             |            |             |        |
| Herd immunity against SARS-CoV-2                                                           |             |            |             | 0.34   |
| >66% of adults aged 18–64 years old must be immunized (either by vaccination or infection) | 1472 (33.3) | 588 (39.9) | 884 (60.1)  |        |
| >50% of adults aged 18–64 years old must be immunized (either by vaccination or infection) | 1471 (33.3) | 608 (41.3) | 863 (58.7)  |        |
| No information                                                                             | 1472 (33.3) | 627 (42.6) | 845 (57.4)  |        |
| General practitioner's advice on vaccination                                               |             |            |             | 0.78   |
| Recommendation                                                                             | 2215 (50.2) | 910 (41.1) | 1305 (58.9) |        |
| No opinion                                                                                 | 2200 (49.8) | 913 (41.5) | 1287 (58.5) |        |

---

\* Chronic conditions include: 137 (34%) asthma; 130 (33%) chronic lung disease other than asthma; 35 (9%) chronic arterial disease; 95 (24%) chronic heart disease; 18 (5%) chronic kidney disease; 39 (10%) cancer.

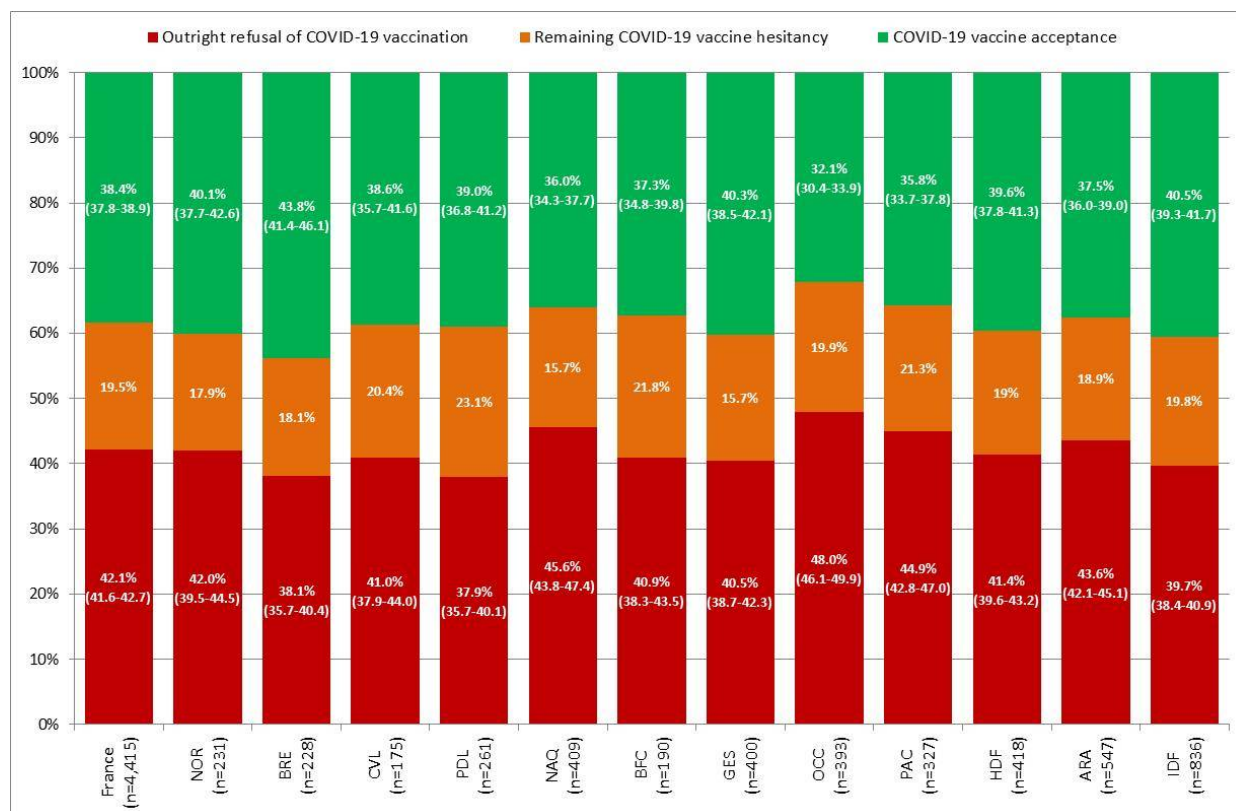

**Figure S1.** Acceptance of Pfizer or Moderna vaccines predicted in the working age population (December 2020, France).

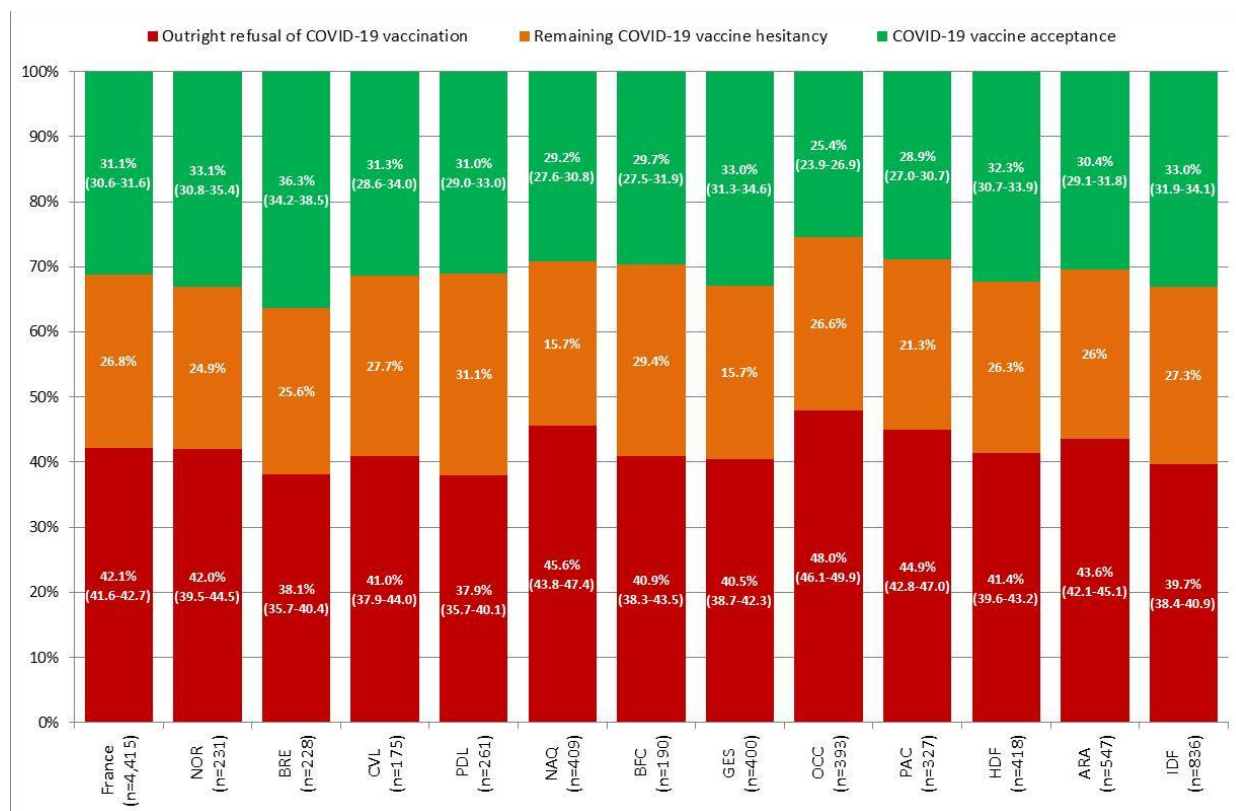

**Figure S2.** Acceptance of AstraZeneca vaccine predicted in the working age population (December 2020, France).
